# Supplementary material for: Black phosphorus thermosensitive hydrogels loaded with bone marrow mesenchymal stem cell-derived exosomes synergistically promote bone tissue defect repair
Source: Royal Society of Chemistry journal article supplement (doi:10.1039/d3tb00341h), 2023-01-01
Supplement: d3tb00341h1.pdf [file d3tb00341h1.pdf]

# **Black phosphorus thermosensitive hydrogels loaded with bone marrow mesenchymal stem cells-derived exosomes synergistically promote bone tissue defect repair**

Tong Xu,<sup>a</sup> Yongmei Hua,<sup>a</sup> Peng Mei,<sup>b</sup> Deliang Zeng,<sup>c</sup> Shengjie Jiang<sup>d</sup> and Chongshan Liao<sup>a\*</sup>

<sup>a</sup> Department of Orthodontics, School & Hospital of Stomatology, Tongji University; Shanghai Engineering Research Center of Tooth Restoration and Regeneration, Shanghai 200072, China

<sup>b</sup> Department of Orthodontics, Shanghai Ninth People's Hospital, Shanghai Jiao Tong University School of Medicine; College of Stomatology, Shanghai Jiao Tong University; National Center for Stomatology; National Clinical Research Center for Oral Diseases; Shanghai Key Laboratory of Stomatology; Shanghai Research Institute of Stomatology, Shanghai 200011, China

<sup>c</sup> Department of Prosthodontics, Shanghai Ninth People's Hospital, Shanghai Jiao Tong University School of Medicine; College of Stomatology, Shanghai Jiao Tong University; National Center for Stomatology; National Clinical Research Center for Oral Diseases; Shanghai Key Laboratory of Stomatology; Shanghai Research Institute of Stomatology, Shanghai 200011, China

<sup>d</sup> Department of Oral & Cranio-Maxillofacial Surgery, Shanghai Ninth People's Hospital, Shanghai Jiao Tong University School of Medicine; College of Stomatology, Shanghai Jiao Tong University; National Center for Stomatology; National Clinical Research Center for Oral Diseases; Shanghai Key Laboratory of Stomatology; Shanghai Research Institute of Stomatology, Shanghai 200011, China

**\*Corresponding author**

Chongshan Liao

Tel.: +86-021-66313715

E-mail: [liao\\_chongshan@tongji.edu.cn](mailto:liao_chongshan@tongji.edu.cn)

**Table S1.** Primers used for the target genes

| Gene          | Primer (F = forward; R = reverse)                            |
|---------------|--------------------------------------------------------------|
| <i>Alp</i>    | F: 5'AACGTGGCCAAGAACATCATCA3'<br>R: 5'TGTCCATCTCCAGCCGTGTC3' |
| <i>Runx-2</i> | F:5'CACAAGTGCGGTGCAAACCTT3'<br>R:5'AAGAGGCTGTTTGACGCCAT3'    |
| <i>Opn</i>    | F:5'AGACTGGCAGTGGTTTGCTT3'<br>R:5'AGTGTTTGCTGTAATGCGCC3'     |
| <i>Colla1</i> | F:5'CCGCTGTCTTCTAGTGTTGCT3'<br>R:5'GGATAAGGGGCGCGATGC3'      |
| <i>Gapdh</i>  | F:5'GGCACAGTCAAGGCTGAGAATG3'<br>R:5'ATGGTGGTGAAGACGCCAGTA3'  |

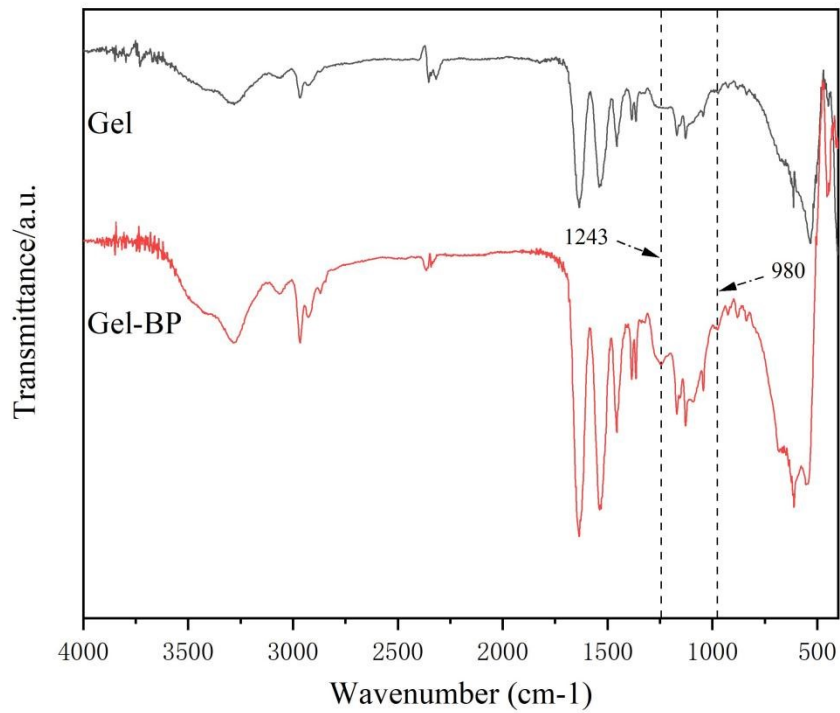

**Figure S1:** FTIR spectrum of Gel and Gel-BP.

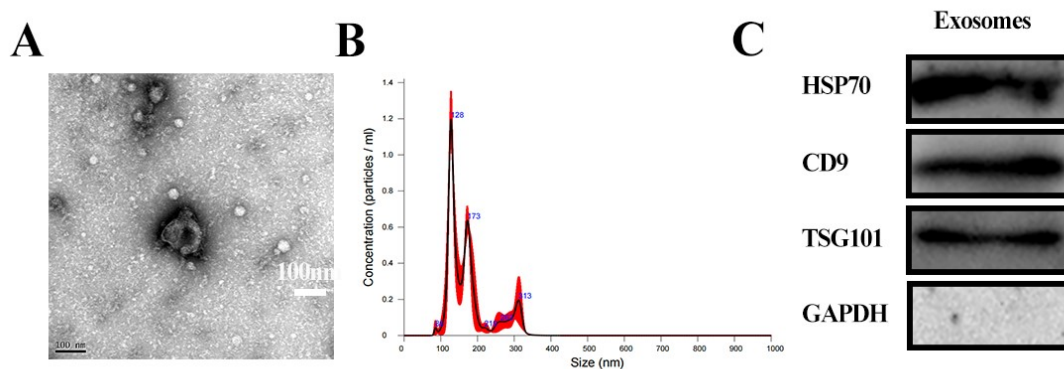

**Figure S2:** Characterization and identification of exosomes. (A) Image of exosomes morphology under TEM. (B) NTA of exosomes. (C) Western blotting of exosome specific protein markers.

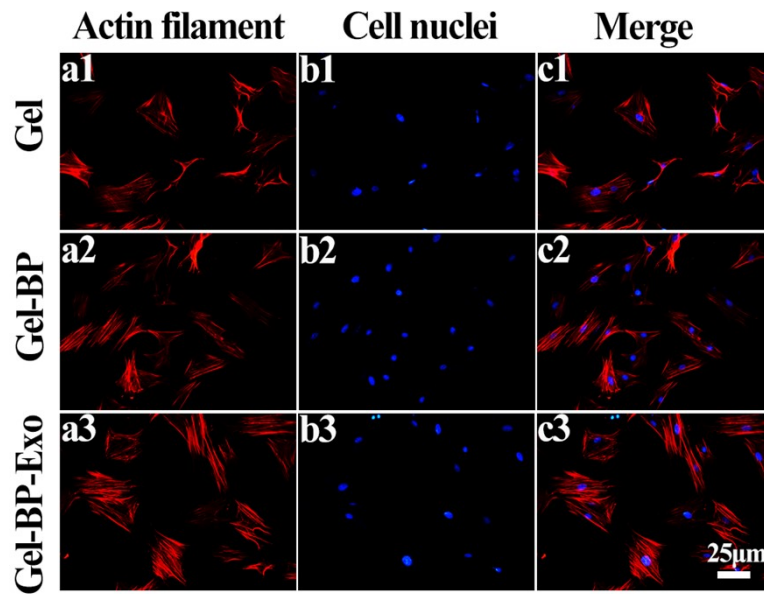

**Figure S3:** BMSCs were cultured on the surface of the Gel, Gel-BP, and Gel-BP-Exo groups for 24 hours. Red: actin (a1, a2, a3), blue: nucleus (b1, b2, b3), merged: actin and nucleus (c1, c2, c3).

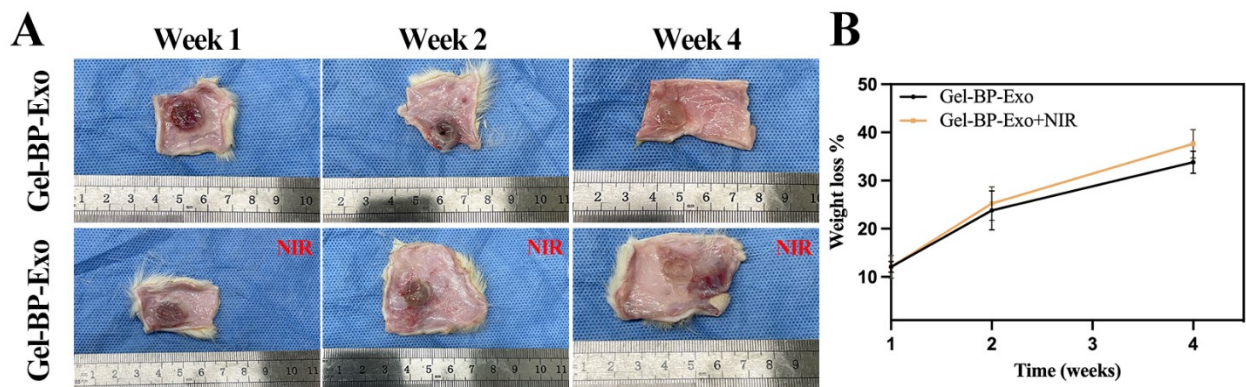

**Figure S4:** *In vivo* degradation following subcutaneous implantation of the Gel-BP-Exo. (A) Gross view of the hydrogels after 1, 2, and 4 weeks of subcutaneous implantation. (B) Change of hydrogel weight for the remaining hydrogel during *in vivo* degradation.

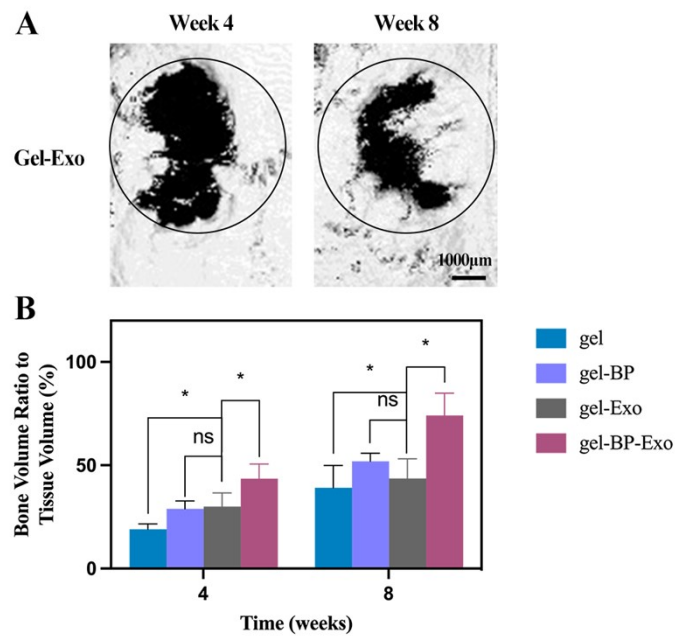

**Figure S5:** Analysis of bone tissue regeneration *in vivo* by micro-CT. (A) 3D reconstruction images of the defects area after implanting Gel- Exo for 4 and 8 weeks. (B) Quantitative analysis of the bone volume ratio to tissue volume based on micro-CT data. (\* indicates significant difference compared to Gel-Exo group,  $P < 0.05$ )

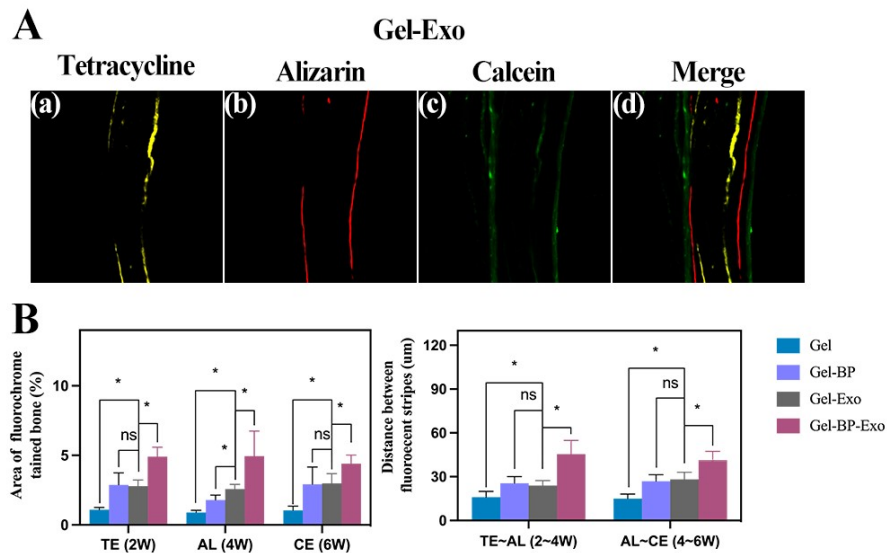

**Figure S6:** (A) Sequential fluorescent labeling images of four groups implanted *in vivo* for 8 weeks. (B) Quantitative analysis of the area of new formed bone tissue by fluorescent staining and the distance between fluorescent bands of new bone. (\* indicates significant difference compared to Gel-Exo group,  $P < 0.05$ )

indicates significant difference compared to Gel-Exo group,  $P < 0.05$ )

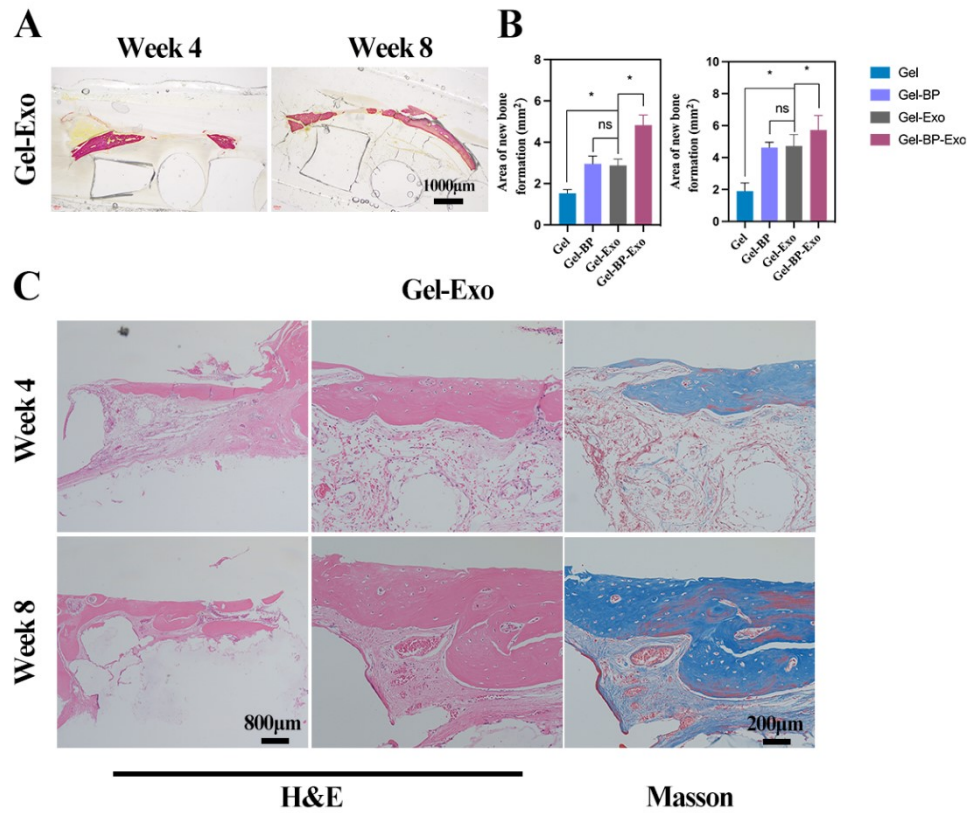

**Figure S7:** Histological staining analysis of bone tissue regeneration *in vivo*. (A) Van Gieson-stained images of new bone for the Gel-Exo group and (B) corresponding quantitative analysis. (C) Histological images of H&E stained and Masson's trichrome stained bone tissue sections of the Gel-Exo group (\* indicates significant difference compared to Gel-Exo group,  $P < 0.05$ )

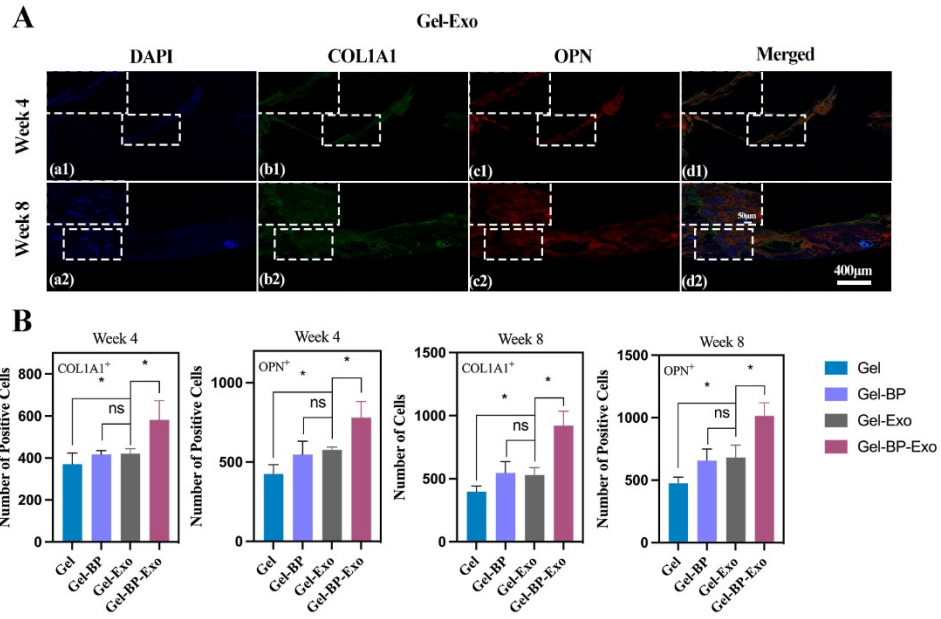

**Figure S8:** Immunofluorescence staining analysis of bone tissue regeneration *in vivo*. (A) Representative immunofluorescence staining of COL1A1 and OPN in defect areas of Week 4 and Week8. (B) Semi-quantification of positively stained cells in (A). (\* indicates significant difference compared to Gel-Exo group,  $P < 0.05$ )
