# Supplementary figures and images for: Black phosphorus thermosensitive hydrogels loaded with bone marrow mesenchymal stem cell-derived exosomes synergistically promote bone tissue defect repair
Source: Royal Society of Chemistry journal article supplement (doi:10.1039/d3tb00341h), 2023-01-01

Raw data associated with Fig. 2C

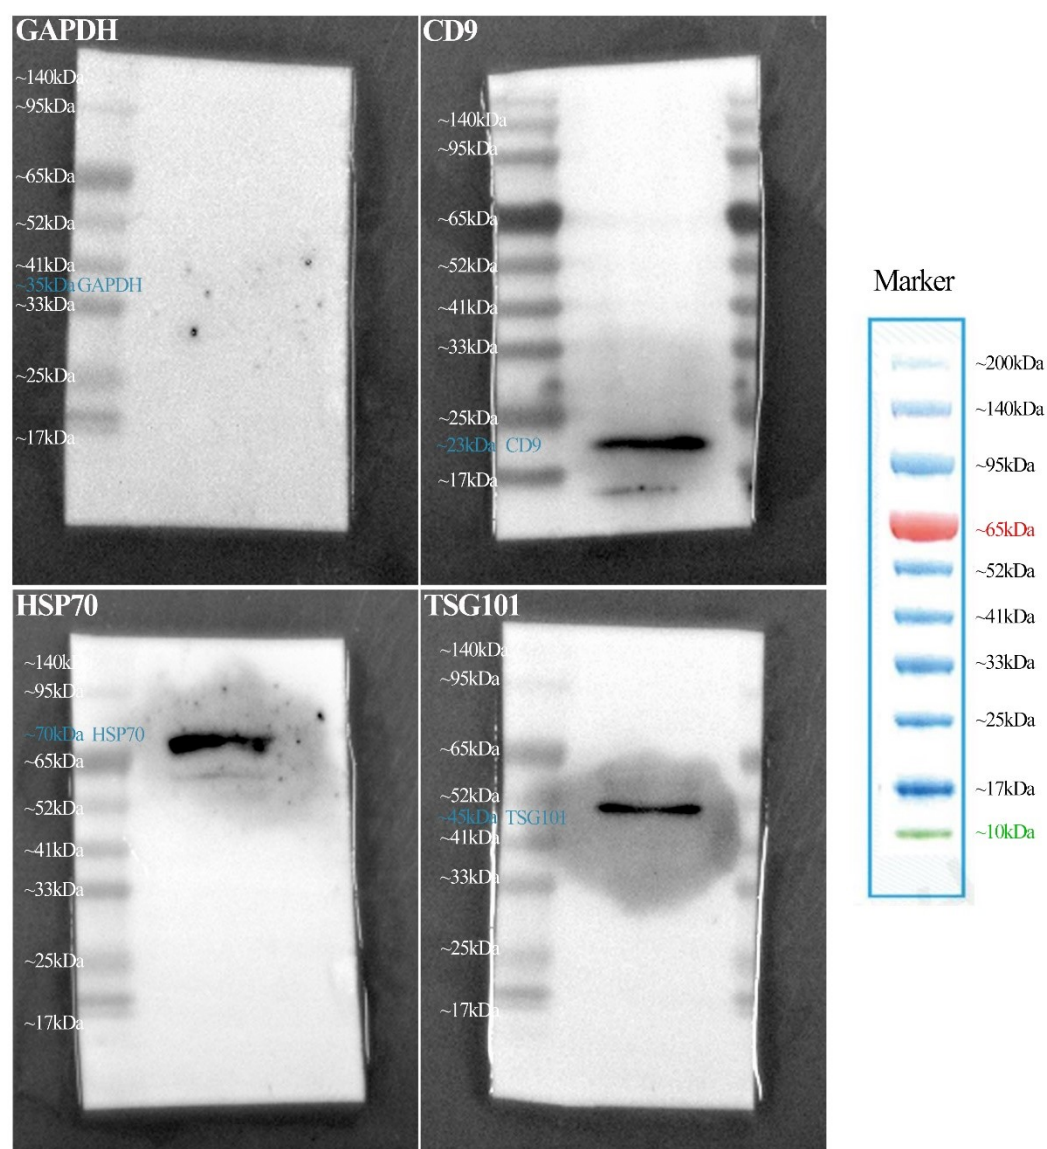

Supplement: d3tb00341h2.pdf [file d3tb00341h2.pdf]
